# Supplementary material for: Molecular packing of pharmaceuticals analyzed with paramagnetic relaxation enhancement and ultrafast magic angle pinning NMR
Source: Royal Society of Chemistry journal article supplement (doi:10.1039/d0cp02049d), 2020-01-01
Supplement: d0cp02049d1.pdf [file d0cp02049d1.pdf]

## Supplementary Information

### **Molecular Packing of Pharmaceuticals Analyzed with Paramagnetic Relaxation Enhancement and Ultrafast Magic Angle Spinning NMR**

Xingyu Lu<sup>1, §</sup>, Yu Tsutsumi<sup>2</sup>, Chengbin Huang<sup>1</sup>, Wei Xu<sup>1</sup>, Stephen R. Byrn<sup>3</sup>,  
Allen C. Templeton<sup>1</sup>, Alexei V. Buevich<sup>1, \*</sup>, Jean-Paul Amoureux<sup>4, 5, 6, \*</sup>, and Yongchao Su<sup>1, 3, 7, \*</sup>

<sup>1</sup> MRL, Merck & Co., Inc., Kenilworth, New Jersey, 07033, United States

<sup>2</sup> Bruker BioSpin KK., 3-9, Moriya-cho, Kanagawa-ku, Yokohama-shi,  
Kanagawa 221-0022, Japan

<sup>3</sup> Department of Industrial and Physical Pharmacy, College of Pharmacy, Purdue University, Indiana  
47907, United States

<sup>4</sup> Univ. Lille, CNRS, Centrale Lille, ENSCL, Univ. Artois, UMR 8181-UCCS-Unité de Catalyse et  
Chimie du Solide, F-59000 Lille, France

<sup>5</sup> Bruker Biospin, 34 rue de l'industrie, F-67166 Wissembourg, France

<sup>6</sup> Riken NMR Science and Development Division, Yokohama, 230-0045 Kanagawa, Japan.

<sup>7</sup> Division of Molecular Pharmaceutics and Drug Delivery, College of Pharmacy, The University of  
Texas at Austin, Austin, Texas 78712, United States

§ Current Address: Instrumentation and Service Center for Physical Sciences, Westlake University,  
Hangzhou, Zhejiang, 310024, China

\* Corresponding authors: Y.S.: [yongchao.su@merck.com](mailto:yongchao.su@merck.com); J.-P. A.: [jean-paul.amoureux@univ-lille.fr](mailto:jean-paul.amoureux@univ-lille.fr); A.V.B: [alexei.buevich@merck.com](mailto:alexei.buevich@merck.com)

## Powder X-ray Diffraction

Powder XRD was conducted on a PANalytical X'Pert Pro X-ray diffractometer (PANalytical, USA) with a Cu K $\alpha$  ( $\lambda = 0.15418$  nm) radiation source, using a step size of  $0.0334^\circ$  and an integration time of 3 s at room temperature.

**Table S1.**  $^{13}\text{C}$  and  $^1\text{H}$  chemical shifts of posaconazole in crystalline (left) and solution (right) state.

| Solid-state NMR     |                                       |                        | Solution NMR <sup>2</sup> |                          |                       |
|---------------------|---------------------------------------|------------------------|---------------------------|--------------------------|-----------------------|
| $^{13}\text{C}$ No. | $^{13}\text{C}$ CS (ppm) <sup>1</sup> | $^1\text{H}$ CS (ppm)* | $^{13}\text{C}$ No.       | $^{13}\text{C}$ CS (ppm) | $^1\text{H}$ CS (ppm) |
| 2                   | 67.2                                  | 3.85                   | 2                         | 69                       | 3.66                  |
| 3                   | 38.4                                  | 2.96                   | 3                         | 38.9                     | 2.61                  |
| 4                   | 45.4                                  | 3.15                   | 4                         | 37.5                     | 2.3                   |
| 5                   | 82.3                                  | -                      | 5                         | 84.3                     | -                     |
| 6                   | 66.5                                  | 3.95                   | 6                         | 70.7                     | 3.9                   |
| 8                   | 151.4                                 | -                      | 8                         | 153                      | -                     |
| 9                   | 115.0                                 | 6.95                   | 9                         | 115.1                    | 6.78                  |
| 10                  | 116.9                                 | 7.54                   | 10                        | 118.5                    | 6.93                  |
| 11                  | 145.3                                 | -                      | 11                        | 145.8                    | -                     |
| 12                  | 116.9                                 | 7.54                   | 12                        | 118.5                    | 6.93                  |
| 13                  | 115.0                                 | 6.95                   | 13                        | 115.1                    | 6.78                  |
| 14                  | 128.5                                 | -                      | 14                        | 125.4                    | -                     |
| 15                  | 158.8                                 | -                      | 15                        | 159                      | -                     |
| 16                  | 105.4                                 | 7.73                   | 16                        | 104.5                    | 6.85                  |
| 17                  | 163.2                                 | -                      | 17                        | 162.8                    | -                     |
| 18                  | 110.0                                 | 7.19                   | 18                        | 111.3                    | 6.82                  |
| 19                  | 128.2                                 | 8.23                   | 19                        | 128.6                    | 7.38                  |
| 20                  | 56.3                                  | 5.05/5.85              | 20                        | 56                       | 4.58                  |
| 23                  | 149.7                                 | 8.78                   | 23                        | 151                      | 7.79                  |
| 25                  | 146.4                                 | 8.98                   | 25                        | 144.6                    | 8.11                  |
| 27                  | 49.3                                  | 3.46                   | 27                        | 50.6                     | 3.25                  |
| 28                  | 48.2                                  | 3.46                   | 28                        | 49.2                     | 3.36                  |
| 30                  | 48.2                                  | 3.46                   | 30                        | 49.2                     | 3.36                  |
| 31                  | 49.3                                  | 3.46                   | 31                        | 50.6                     | 3.25                  |
| 34                  | 149.7                                 | -                      | 34                        | 150.7                    | -                     |
| 35                  | 116.9                                 | 7.54                   | 35                        | 116.6                    | 7.03                  |
| 36                  | 122.0                                 | 9.5                    | 38                        | 123.6                    | 7.43                  |
| 37                  | 127.9                                 | -                      | 37                        | 125.5                    | -                     |
| 38                  | 121.1                                 | 8.78                   | 36                        | 123.6                    | 7.43                  |
| 39                  | 116.9                                 | 7.54                   | 39                        | 116.6                    | 7.03                  |
| 41                  | 153.9                                 | -                      | 41                        | 153.1                    | -                     |
| 44                  | 135.1                                 | 11.07                  | 44                        | 134.6                    | 7.67                  |
| 46                  | 65.1                                  | 4.73                   | 47                        | 68.9                     | 4.06                  |
| 47                  | 69.2                                  | 4.73                   | 46                        | 63.5                     | 4.02                  |
| 49                  | 22.2                                  | 1.65                   | 49                        | 23.5                     | 1.94                  |
| 50                  | 9.2                                   | 0.34                   | 50                        | 10.7                     | 0.94                  |
| 51                  | 22.2                                  | 2.24                   | 51                        | 21                       | 1.22                  |

\*  $^1\text{H}$  chemical shifts are tentatively assigned.

**Table S2.** Full  $^{19}\text{F}$ - $^1\text{H}$  and  $^1\text{H}$ - $^1\text{H}$  inter-nuclear contacts identified in  $^1\text{H}$ -detected 2Ds and corresponding distance data derived from X-ray diffraction.<sup>3</sup> Note that a range of  $^{19}\text{F}$ - $^1\text{H}$  and  $^1\text{H}$ - $^1\text{H}$  proximities are reported here since multiple protons might exist and connect to same carbon atom.

| <b>2D experiments</b>                                                                               | <b>Spin contacts</b>           | <b>Intramolecular</b> | <b>Intermolecular</b> | <b>Inter-nuclear distance from X-ray (<math>\text{\AA}</math>)<sup>3</sup></b> |
|-----------------------------------------------------------------------------------------------------|--------------------------------|-----------------------|-----------------------|--------------------------------------------------------------------------------|
| $^1\text{H}$ - $^{19}\text{F}$ HETCOR<br>50 $\mu\text{s}$ contact time<br>$\nu_{\text{R}} = 60$ kHz | $^1\text{H}$ - $^{19}\text{F}$ | F2-H16                |                       | 2.53                                                                           |
|                                                                                                     | $^1\text{H}$ - $^{19}\text{F}$ | F1-H16                |                       | 2.55                                                                           |
|                                                                                                     | $^1\text{H}$ - $^{19}\text{F}$ | F1-H18                |                       | 2.53                                                                           |
|                                                                                                     | $^1\text{H}$ - $^{19}\text{F}$ |                       | F1-H23                | 2.43                                                                           |
|                                                                                                     | $^1\text{H}$ - $^{19}\text{F}$ |                       | F1-H49/51             | 3.73-5.29                                                                      |
| $^1\text{H}$ - $^{19}\text{F}$ HETCOR<br>1 ms contact time<br>$\nu_{\text{R}} = 60$ kHz             | $^1\text{H}$ - $^{19}\text{F}$ | F2-H18                |                       | 5.02                                                                           |
|                                                                                                     | $^1\text{H}$ - $^{19}\text{F}$ |                       | F1-H46/47             | 3.45/5.80                                                                      |
|                                                                                                     | $^1\text{H}$ - $^{19}\text{F}$ |                       | F1-H50                | 5.76-6.48                                                                      |
|                                                                                                     | $^1\text{H}$ - $^{19}\text{F}$ |                       | F2-H23                | 5.53                                                                           |
|                                                                                                     | $^1\text{H}$ - $^{19}\text{F}$ |                       | F2-H49/51             | 3.73-5.37                                                                      |
|                                                                                                     | $^1\text{H}$ - $^{19}\text{F}$ |                       | F2-H46/47             | 5.62-5.92                                                                      |
|                                                                                                     | $^1\text{H}$ - $^{19}\text{F}$ |                       | F2-H50                | 4.76-6.02                                                                      |
| $^1\text{H}$ - $^1\text{H}$ RFDR<br>$\nu_{\text{R}} = 60$ kHz                                       | $^1\text{H}$ - $^1\text{H}$    | H50-H49/51            |                       | 2.32-5.91                                                                      |
|                                                                                                     | $^1\text{H}$ - $^1\text{H}$    | H50-H46/47            |                       | 2.53-4.71                                                                      |
|                                                                                                     | $^1\text{H}$ - $^1\text{H}$    | H49/51-H46/47         |                       | 2.29-3.51                                                                      |
|                                                                                                     | $^1\text{H}$ - $^1\text{H}$    | H44-H46/47            |                       | 4.63-5.00                                                                      |
|                                                                                                     | $^1\text{H}$ - $^1\text{H}$    | H44-H38               |                       | 2.31                                                                           |
|                                                                                                     | $^1\text{H}$ - $^1\text{H}$    |                       | H44-H25               | 3.74                                                                           |
| $^1\text{H}$ - $^1\text{H}$ RFDR<br>$\nu_{\text{R}} = 110$ kHz                                      | $^1\text{H}$ - $^1\text{H}$    |                       | H50-H3/4              | 2.40-5.79                                                                      |
|                                                                                                     | $^1\text{H}$ - $^1\text{H}$    |                       | H50-H2                | 4.36-6.48                                                                      |
|                                                                                                     | $^1\text{H}$ - $^1\text{H}$    |                       | H50-H6                | 4.50-6.41                                                                      |
|                                                                                                     | $^1\text{H}$ - $^1\text{H}$    | H50-H44               |                       | 4.18-5.58                                                                      |
|                                                                                                     | $^1\text{H}$ - $^1\text{H}$    | H49-H51               |                       | 2.27-4.15                                                                      |
|                                                                                                     | $^1\text{H}$ - $^1\text{H}$    |                       | H51-H20               | 4.08-6.25                                                                      |
|                                                                                                     | $^1\text{H}$ - $^1\text{H}$    |                       | H51-H16               | 2.78-4.31                                                                      |
|                                                                                                     | $^1\text{H}$ - $^1\text{H}$    |                       | H51-H25               | 4.54-5.23                                                                      |
|                                                                                                     | $^1\text{H}$ - $^1\text{H}$    | H3-H2/H6              |                       | 2.28-2.83                                                                      |
|                                                                                                     | $^1\text{H}$ - $^1\text{H}$    | H4-H2/H6              |                       | 2.46-3.90                                                                      |
|                                                                                                     | $^1\text{H}$ - $^1\text{H}$    | H3/4-H25              |                       | 4.52-5.38                                                                      |
|                                                                                                     | $^1\text{H}$ - $^1\text{H}$    |                       | H3/4-H38              | 4.8-6.62                                                                       |
|                                                                                                     | $^1\text{H}$ - $^1\text{H}$    |                       | H3/4-H36              | 5.35-6.97                                                                      |
|                                                                                                     | $^1\text{H}$ - $^1\text{H}$    |                       | H6-H36                | 3.25-3.96                                                                      |
|                                                                                                     | $^1\text{H}$ - $^1\text{H}$    |                       | H46/47-H20            | 3.74-6.40                                                                      |
|                                                                                                     | $^1\text{H}$ - $^1\text{H}$    |                       | H46/47-H16            | 4.00-5.45                                                                      |
|                                                                                                     | $^1\text{H}$ - $^1\text{H}$    | H46/47-H38            |                       | 6.31-6.36                                                                      |
|                                                                                                     | $^1\text{H}$ - $^1\text{H}$    |                       | H46/47-H25            | 2.85-4.81                                                                      |
|                                                                                                     | $^1\text{H}$ - $^1\text{H}$    | H20-H23/25            |                       | 2.61-4.95                                                                      |
|                                                                                                     | $^1\text{H}$ - $^1\text{H}$    |                       | H20-H38               | 6.03-7.18                                                                      |
| $^1\text{H}$ - $^1\text{H}$                                                                         | H16-H23/H25                    |                       | 6.64-7.48             |                                                                                |

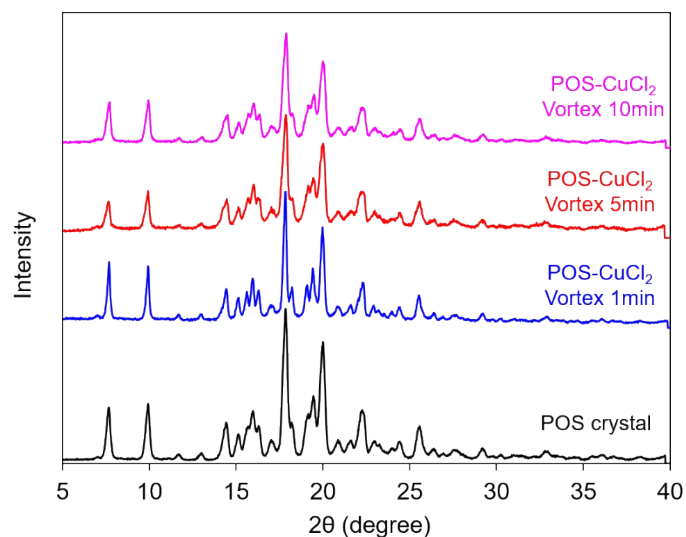

**Figure S1.** PXR D patterns of crystalline POSA without (black) and with (colored) Cu(II) doping on particles surface at different vortex times.

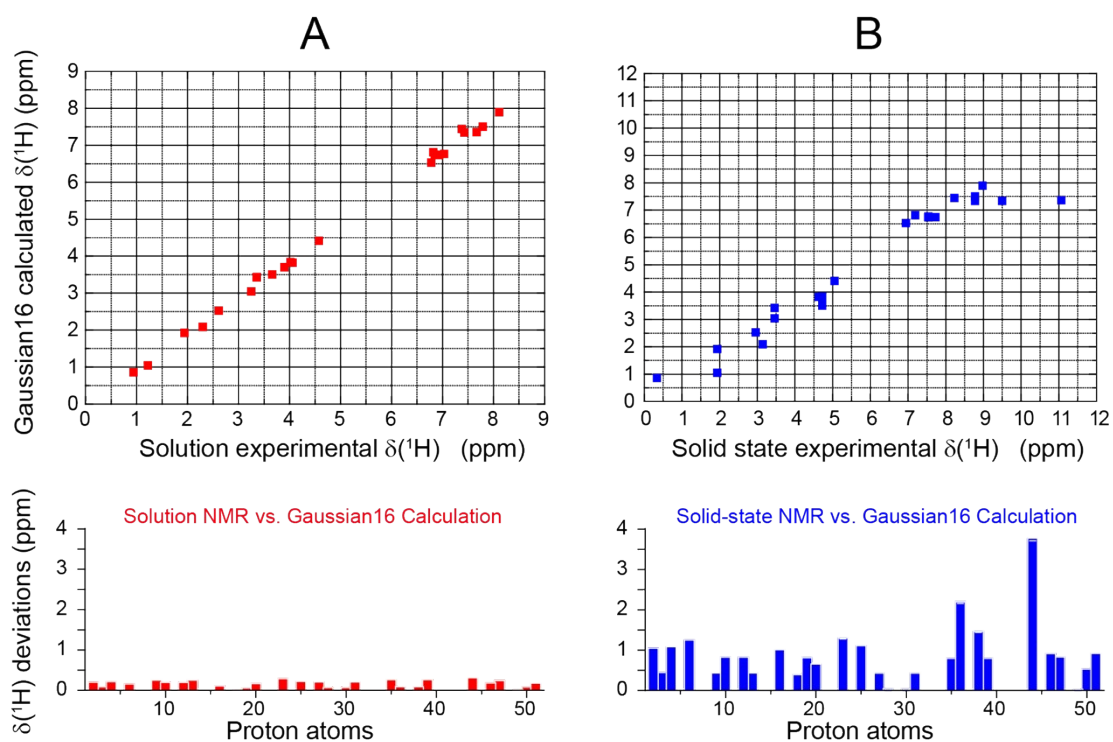

**Figure S2.** Comparison of  $^1\text{H}$  chemical shifts in POSA calculated using Gaussian16 with experimental values in solution (A) and solid-state (B).

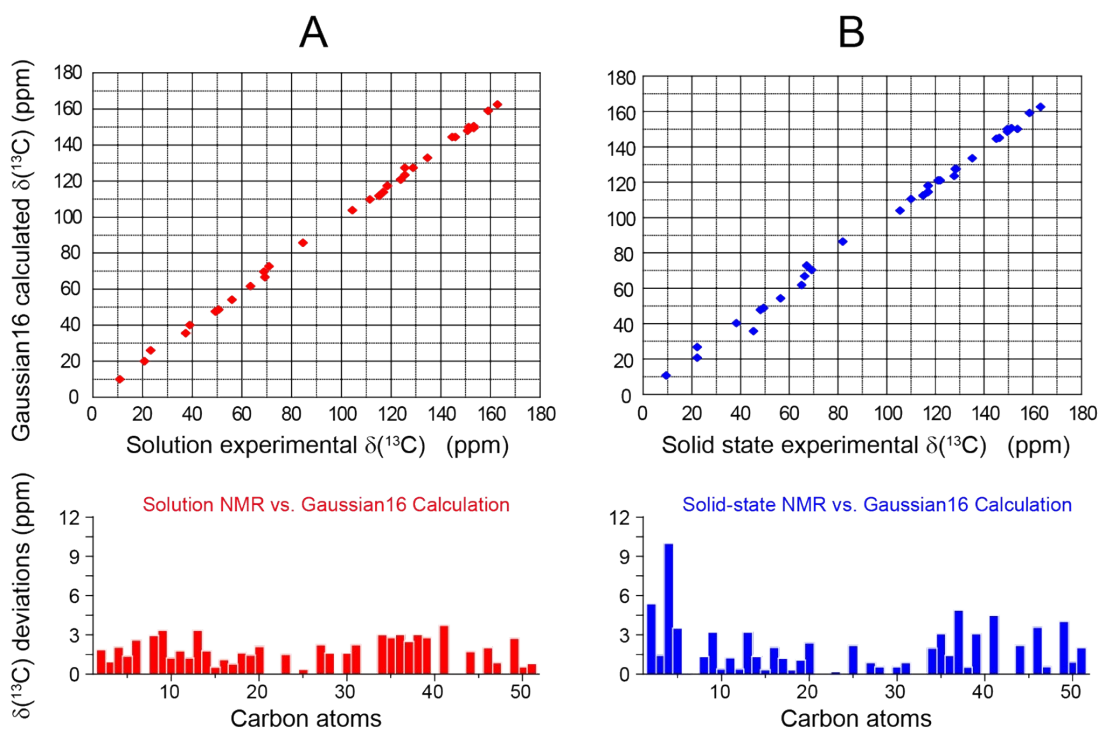

**Figure S3.** Comparison of  $^{13}\text{C}$  chemical shifts in POSA calculated using Gaussian16 with experimental values in solution (A) and solid-state (B).

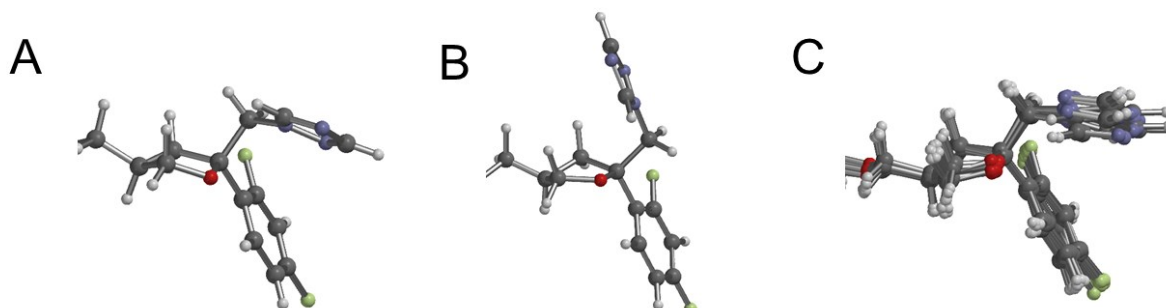

**Figure S4.** Conformational comparison of the difluorophenyl end of POSA in solid state (A), lowest energy conformation in solution (B) and eight high-energy solution conformations (DE = 3.0- 5.0 kcal/mol) with similar ring orientation to that in the solid state.

## Reference

1. Lu, X.; Huang, C.; Li, M.; Skomski, D.; Xu, W.; Yu, L.; Byrn, R. S.; Templeton, C. A.; Su, Y., Molecular Mechanism of Crystalline-to-Amorphous Conversion of Pharmaceutical Solids from  $^{19}\text{F}$  Magic Angle Spinning NMR. *J. Phys. Chem. B*, **2020**, <https://doi.org/10.1021/acs.jpcc.0c02131>
2. Yang, F; Su, Y; Small, J; Huang, C; Martin, G. E; Farrington, A. M.; DiNunzio, J; and Brown, C. D, Probing the Molecular-Level Interactions in an Active Pharmaceutical Ingredient (API) - Polymer Dispersion and The Resulting Impact on Drug Product Formulation, *Pharmaceutical Research*, **2020**, 37, 94
3. McQuiston, D. K; Mucalo, M. R; and Saunders, G. C, The structure of posaconazole and its solvates with methanol, and dioxane and water: Difluorophenyl as a hydrogen bond donor, *Journal of Molecular Structure*, **2019**, 1179, 477-486.
